# Supplementary material for: Diversity-sensitive measures in German hospitals – attitudes, implementation, and barriers according to administration managers
Source: Springer Nature journal article supplement (doi:10.1186/s12913-022-08058-3), 2022-05-23
Supplement: MOESM1 [file 22767066]

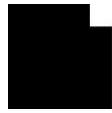

**UNIVERSITÄT  
BIELEFELD**

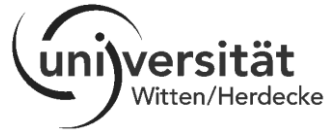

Fragebogen

**Umsetzungsstrategien einer diversitätssensiblen  
Gesundheitsversorgung**

*Befragung von Versorgungseinrichtungen*

Sehr geehrte Damen und Herren,

mit diesem Fragebogen werden diversitätssensible Instrumente und Maßnahmen von Versorgungseinrichtungen erfasst sowie Strategien zur Umsetzung solcher Maßnahmen ermittelt. Der Fragebogen kommt im Rahmen der Studie DiversityKAT zum Einsatz. Nähere Informationen dazu finden Sie im beiliegenden Anschreiben.

Zwei Begriffe, die im Fragebogen verwendet werden, möchten wir vorab erläutern:

- **Diversitätssensibilität:** Mit Diversitätssensibilität oder diversitätssensiblem Umgang ist die Berücksichtigung der Vielfalt von Mitarbeitern/innen oder Patienten/innen im Hinblick auf Faktoren wie z.B. Geschlecht, Alter, Kultur, Sprache und Behinderung gemeint.
- **Maßnahmen diversitätssensibler Versorgung:** Hiermit sind Angebote, Leistungen und Maßnahmen gemeint, die zu einem diversitätssensiblen Umgang mit Mitarbeitern/innen und/oder Patienten/innen beitragen. Hierzu zählt zum Beispiel, mehrsprachige Informationen vorzuhalten oder eine durchgehende Barrierefreiheit zu gewährleisten. Weitere Beispiele finden Sie in diesem Fragebogen.

Im Fragebogen bitten wir Sie, die Antworten/Aspekte, die für Ihre Einrichtung zutreffend sind, anzukreuzen. Wir würden uns freuen, wenn Sie jede Frage beantworten würden. Wenn Sie sich an einigen Stellen nicht sicher sind, reichen uns auch Ihre Einschätzungen. Fragen, die nicht zu Ihrer Einrichtung passen, können Sie einfach auslassen. Das Ausfüllen des Fragebogens nimmt ca. 10-15 Minuten in Anspruch. Sollten Sie Fragen zur Studie oder zum Ausfüllen des Fragebogens haben, stehen wir Ihnen sehr gerne zur Verfügung.

Für Ihre Unterstützung danken wir Ihnen herzlichst.

## Block 1: Organisationsbezogene Merkmale und Maßnahmen

|                                                                          |                                                    |                                          |
|--------------------------------------------------------------------------|----------------------------------------------------|------------------------------------------|
| <b>1. Bitte geben Sie die Art der Trägerschaft Ihrer Einrichtung an:</b> |                                                    |                                          |
| <input type="checkbox"/> Staatlicher Träger                              | <input type="checkbox"/> Freigemeinnütziger Träger | <input type="checkbox"/> Privater Träger |

|                                                                                 |                              |                                |                                |                                |                                  |                                  |                                       |
|---------------------------------------------------------------------------------|------------------------------|--------------------------------|--------------------------------|--------------------------------|----------------------------------|----------------------------------|---------------------------------------|
| <b>2. Bitte geben Sie an, wie viele Mitarbeiter/innen Ihre Einrichtung hat:</b> |                              |                                |                                |                                |                                  |                                  |                                       |
| <input type="checkbox"/> 1-5                                                    | <input type="checkbox"/> 6-9 | <input type="checkbox"/> 10-19 | <input type="checkbox"/> 20-49 | <input type="checkbox"/> 50-99 | <input type="checkbox"/> 100-199 | <input type="checkbox"/> 200-499 | <input type="checkbox"/> 500 und mehr |

|                                                                                                    |                                |                                  |                                  |                                         |
|----------------------------------------------------------------------------------------------------|--------------------------------|----------------------------------|----------------------------------|-----------------------------------------|
| <b>3. Bitte schätzen Sie, wie viele Menschen Ihre Einrichtung im Monat etwa betreut/behandelt:</b> |                                |                                  |                                  |                                         |
| <input type="checkbox"/> Unter 50                                                                  | <input type="checkbox"/> 50-99 | <input type="checkbox"/> 100-499 | <input type="checkbox"/> 500-999 | <input type="checkbox"/> 1000 oder mehr |

| <b>4. Welche der folgenden Aspekte zur Diversitätssensibilität wurden in Ihrer Einrichtung umgesetzt bzw. sind in Planung?</b>                | Nein                     | In Planung               | Bereits umgesetzt        |
|-----------------------------------------------------------------------------------------------------------------------------------------------|--------------------------|--------------------------|--------------------------|
| Berücksichtigung diversitätssensibler Aspekte im Leitbild                                                                                     | <input type="checkbox"/> | <input type="checkbox"/> | <input type="checkbox"/> |
| Berücksichtigung diversitätssensibler Aspekte im Qualitätsmanagement (z. B. bei der Bearbeitung von Patienten/innen-Beschwerden)              | <input type="checkbox"/> | <input type="checkbox"/> | <input type="checkbox"/> |
| Gezielte Öffentlichkeitsarbeit zum Thema Diversitätssensibilität                                                                              | <input type="checkbox"/> | <input type="checkbox"/> | <input type="checkbox"/> |
| Gründung von Arbeitsgruppen zum Thema Diversitätssensibilität                                                                                 | <input type="checkbox"/> | <input type="checkbox"/> | <input type="checkbox"/> |
| Benennung oder Einstellung von Diversitätsbeauftragten                                                                                        | <input type="checkbox"/> | <input type="checkbox"/> | <input type="checkbox"/> |
| Überprüfung des Erfolgs (Evaluation) diversitätssensibler Maßnahmen                                                                           | <input type="checkbox"/> | <input type="checkbox"/> | <input type="checkbox"/> |
| Regelmäßige Fortbildungen/Schulungen/Fachberatungen für Mitarbeiter/innen zur Förderung der Diversitätssensibilität                           | <input type="checkbox"/> | <input type="checkbox"/> | <input type="checkbox"/> |
| Einbeziehung externer Dienstleister oder Organisationen (z.B. Beratung/Coaching) in die Planung oder Umsetzung diversitätssensibler Maßnahmen | <input type="checkbox"/> | <input type="checkbox"/> | <input type="checkbox"/> |
| Sonstige, und zwar:  _____                                 |                          | <input type="checkbox"/> | <input type="checkbox"/> |

|                                                                                                                                                                                                                                |                                                                                                                                                     |
|--------------------------------------------------------------------------------------------------------------------------------------------------------------------------------------------------------------------------------|-----------------------------------------------------------------------------------------------------------------------------------------------------|
| <b>4.1 Sofern alle oder einige der o.g. Aspekte zur Diversitätssensibilität umgesetzt werden bzw. in Planung sind, auf welchen Dimensionen von Diversität liegt dann hauptsächlich der Fokus? (Mehrfachantworten möglich.)</b> |                                                                                                                                                     |
| <input type="checkbox"/> Migrationshintergrund/Kultur/Religion                                                                                                                                                                 | <input type="checkbox"/> Geschlecht <input type="checkbox"/> Alter <input type="checkbox"/> Behinderung <input type="checkbox"/> Sexuelle Identität |
| <input type="checkbox"/> Sonstige, und zwar:  _____                                                                                         |                                                                                                                                                     |

## Block 2: Umgang mit der Diversität von Mitarbeitern/innen

|                                                                                                                                      |                                                                      |
|--------------------------------------------------------------------------------------------------------------------------------------|----------------------------------------------------------------------|
| <b>5. Bei der Personalpolitik achten wir darauf, dass unser Personal einen Mindestanteil hat an:</b><br>(Mehrfachnennungen möglich.) |                                                                      |
| <input type="checkbox"/> Menschen mit Migrationshintergrund                                                                          | <input type="checkbox"/> älteren Mitarbeiter/innen                   |
| <input type="checkbox"/> Mitarbeiter/innen mit körperlichen oder geistigen Einschränkungen                                           | <input type="checkbox"/> männlichen bzw. weiblichen Mitarbeiterinnen |

| <b>6. In der Personalpolitik achten wir auf folgende Aspekte.</b><br>(Bitte teilen Sie zu jeder Aussage mit, wie sehr sie zutrifft.)                                      | Trifft gar nicht zu      | Trifft eher nicht zu     | Trifft eher zu           | Trifft voll zu           |
|---------------------------------------------------------------------------------------------------------------------------------------------------------------------------|--------------------------|--------------------------|--------------------------|--------------------------|
| Durch spezielle Beratungs- und Förderangebote erhöhen wir den Frauenanteil in Führungspositionen.                                                                         | <input type="checkbox"/> | <input type="checkbox"/> | <input type="checkbox"/> | <input type="checkbox"/> |
| Durch Sprachkurse fördern wir Deutschkenntnisse unserer Mitarbeiter/innen.                                                                                                | <input type="checkbox"/> | <input type="checkbox"/> | <input type="checkbox"/> | <input type="checkbox"/> |
| Durch Sprachkurse fördern wir Fremdsprachenkenntnisse unserer Mitarbeiter/innen.                                                                                          | <input type="checkbox"/> | <input type="checkbox"/> | <input type="checkbox"/> | <input type="checkbox"/> |
| Wir werben gezielt Mitarbeiter/innen im Ausland an.                                                                                                                       | <input type="checkbox"/> | <input type="checkbox"/> | <input type="checkbox"/> | <input type="checkbox"/> |
| Wir achten darauf, dass unser Personal vielfältig in Bezug auf Alter, Geschlecht, Migrationshintergrund oder körperliche/psychische Einschränkungen bleibt.               | <input type="checkbox"/> | <input type="checkbox"/> | <input type="checkbox"/> | <input type="checkbox"/> |
| Wir schreiben vakante Stellen auch über Gemeindefnetzwerke und andere Quellen aus, um explizit benachteiligte Menschen (z.B. mit Behinderungen) anzusprechen.             | <input type="checkbox"/> | <input type="checkbox"/> | <input type="checkbox"/> | <input type="checkbox"/> |
| Wir haben Maßnahmen (z.B. Leitbilder) implementiert, um Mitarbeiter/innen und Patienten/innen unterschiedlicher sexueller Identität (z.B. Transgender etc.) anzusprechen. | <input type="checkbox"/> | <input type="checkbox"/> | <input type="checkbox"/> | <input type="checkbox"/> |
| Wir haben Angebote (z.B. Mentorenprogramme) um neuen Mitarbeitern/innen mit besonderen Bedarfen (z.B. Behinderungen) den Einstieg zu erleichtern.                         | <input type="checkbox"/> | <input type="checkbox"/> | <input type="checkbox"/> | <input type="checkbox"/> |
| Sonstiges, und zwar:  _____                                                            |                          | <input type="checkbox"/> | <input type="checkbox"/> | <input type="checkbox"/> |

| <b>7. Welche der folgenden Angebote stehen in Ihrer Einrichtung für Mitarbeiter/innen zur Verfügung?</b><br>(Mehrfachantworten möglich) |                                                                                                                                        |
|-----------------------------------------------------------------------------------------------------------------------------------------|----------------------------------------------------------------------------------------------------------------------------------------|
| <input type="checkbox"/> flexible Arbeitszeiten                                                                                         | <input type="checkbox"/> Betriebs-Kindertagesstätte                                                                                    |
| <input type="checkbox"/> Home-Office (Möglichkeit, zumindest z. T. von zuhause zu arbeiten)                                             | <input type="checkbox"/> Bei Bedarf zusätzliche (ggf. unbezahlte) Urlaubstage (zur Kinderbetreuung, Pflege von Angehörigen etc.)       |
| <input type="checkbox"/> Job-Sharing<br>(zwei Mitarbeiter/innen teilen sich eine Stelle)                                                | <input type="checkbox"/> andere, und zwar:  _____ |

| <b>8. Gibt es spezielle Beratungs- und Unterstützungsangebote (z. B. Angebote der betrieblichen Gesundheitsförderung, Medienkompetenzschulung etc.) für...? (Mehrfachantworten möglich.)</b> |                                                                                                                               |
|----------------------------------------------------------------------------------------------------------------------------------------------------------------------------------------------|-------------------------------------------------------------------------------------------------------------------------------|
| <input type="checkbox"/> Es gibt (bisher) keine solchen Angebote.                                                                                                                            | <input type="checkbox"/> Es besteht kein Bedarf an solchen Angeboten.                                                         |
| <input type="checkbox"/> ältere Mitarbeiter/innen                                                                                                                                            | <input type="checkbox"/> jüngere Mitarbeiter/innen                                                                            |
| <input type="checkbox"/> weibliche Mitarbeiterinnen                                                                                                                                          | <input type="checkbox"/> männliche Mitarbeiter                                                                                |
| <input type="checkbox"/> Mitarbeiter/innen mit körperlichen oder geistigen Einschränkungen                                                                                                   | <input type="checkbox"/> Mitarbeiter/innen unterschiedlicher Religion/Weltanschauung                                          |
| <input type="checkbox"/> Mitarbeiter/innen mit Migrationshintergrund                                                                                                                         | <input type="checkbox"/> Sonstiges:  _____ |

## Block 3: Umgang mit der Diversität von Patienten/innen

### Information und Kommunikation

| 9. Werden die folgenden Materialien in verschiedenen Sprachen angeboten?                                                                                                                                                                                                                  | Nicht zutreffend         | Nein                     | In Planung               | Ja                       |
|-------------------------------------------------------------------------------------------------------------------------------------------------------------------------------------------------------------------------------------------------------------------------------------------|--------------------------|--------------------------|--------------------------|--------------------------|
| Schriftliche Einverständniserklärungen                                                                                                                                                                                                                                                    | <input type="checkbox"/> | <input type="checkbox"/> | <input type="checkbox"/> | <input type="checkbox"/> |
| Schriftliche Form- und Merkblätter zum Aufenthalt                                                                                                                                                                                                                                         | <input type="checkbox"/> | <input type="checkbox"/> | <input type="checkbox"/> | <input type="checkbox"/> |
| Internetseiten/Homepage                                                                                                                                                                                                                                                                   | <input type="checkbox"/> | <input type="checkbox"/> | <input type="checkbox"/> | <input type="checkbox"/> |
| Speisepläne                                                                                                                                                                                                                                                                               | <input type="checkbox"/> | <input type="checkbox"/> | <input type="checkbox"/> | <input type="checkbox"/> |
| Sonstige, und zwar:  _____                                                                                                                                                                               |                          |                          | <input type="checkbox"/> | <input type="checkbox"/> |
| <b>9.1 Falls Materialien mehrsprachig angeboten werden, bitte nennen Sie die häufigsten Sprachen hiervon:</b><br>(Mehrfachantworten möglich)                                                                                                                                              |                          |                          |                          |                          |
| <input type="checkbox"/> Englisch <input type="checkbox"/> Türkisch <input type="checkbox"/> Russisch <input type="checkbox"/> Polnisch <input type="checkbox"/> Arabisch             Sonstige:  _____ |                          |                          |                          |                          |

| 10. Werden die folgenden Leistungen Ihrer Einrichtung in verschiedenen Sprachen angeboten?                                                                                                                                                                                                  | Nicht zutreffend         | Nein                     | In Planung               | Ja                       |
|---------------------------------------------------------------------------------------------------------------------------------------------------------------------------------------------------------------------------------------------------------------------------------------------|--------------------------|--------------------------|--------------------------|--------------------------|
| Aufnahme- oder Entlassungsgespräche                                                                                                                                                                                                                                                         | <input type="checkbox"/> | <input type="checkbox"/> | <input type="checkbox"/> | <input type="checkbox"/> |
| Beratungsgespräche (z.B. Sozialberatung oder Ernährungsberatung)                                                                                                                                                                                                                            | <input type="checkbox"/> | <input type="checkbox"/> | <input type="checkbox"/> | <input type="checkbox"/> |
| Behandlungen                                                                                                                                                                                                                                                                                | <input type="checkbox"/> | <input type="checkbox"/> | <input type="checkbox"/> | <input type="checkbox"/> |
| Schulungen, Vorträge, Seminare (sofern zutreffend)                                                                                                                                                                                                                                          | <input type="checkbox"/> | <input type="checkbox"/> | <input type="checkbox"/> | <input type="checkbox"/> |
| <b>10.1 Falls Leistungen mehrsprachig angeboten werden, bitte nennen Sie die häufigsten Sprachen hiervon:</b><br>(Mehrfachantworten möglich)                                                                                                                                                |                          |                          |                          |                          |
| <input type="checkbox"/> Englisch <input type="checkbox"/> Türkisch <input type="checkbox"/> Russisch <input type="checkbox"/> Polnisch <input type="checkbox"/> Arabisch             Sonstige:  _____ |                          |                          |                          |                          |

| 11. Werden die folgenden Materialien/Formulare in Ihrer Einrichtung sprachunabhängig (Verwendung von Abbildungen, Piktogrammen) angeboten? | Nicht zutreffend         | Nein                     | In Planung               | Ja                       |
|--------------------------------------------------------------------------------------------------------------------------------------------|--------------------------|--------------------------|--------------------------|--------------------------|
| Informationsmaterial                                                                                                                       | <input type="checkbox"/> | <input type="checkbox"/> | <input type="checkbox"/> | <input type="checkbox"/> |
| Beschilderung oder Wegweiser                                                                                                               | <input type="checkbox"/> | <input type="checkbox"/> | <input type="checkbox"/> | <input type="checkbox"/> |
| Therapiepläne                                                                                                                              | <input type="checkbox"/> | <input type="checkbox"/> | <input type="checkbox"/> | <input type="checkbox"/> |
| Speisepläne                                                                                                                                | <input type="checkbox"/> | <input type="checkbox"/> | <input type="checkbox"/> | <input type="checkbox"/> |
| Sonstige, und zwar:  _____                              |                          |                          | <input type="checkbox"/> | <input type="checkbox"/> |

| 12. Inwieweit werden in Ihrer Einrichtung die folgenden Personen zum Dolmetschen/Übersetzen für Patienten/innen mit geringen Deutschkenntnissen hinzugezogen? | Nicht zutreffend         | Gar nicht                | Manchmal                 | Oft                      |
|---------------------------------------------------------------------------------------------------------------------------------------------------------------|--------------------------|--------------------------|--------------------------|--------------------------|
| Angehörige, Freunde oder Bekannte der Patienten/innen                                                                                                         | <input type="checkbox"/> | <input type="checkbox"/> | <input type="checkbox"/> | <input type="checkbox"/> |
| Zimmernachbarn oder andere Patienten/innen der Einrichtung                                                                                                    | <input type="checkbox"/> | <input type="checkbox"/> | <input type="checkbox"/> | <input type="checkbox"/> |
| Ärztliches, pflegerisches oder therapeutisches Personal mit gleicher Muttersprache                                                                            | <input type="checkbox"/> | <input type="checkbox"/> | <input type="checkbox"/> | <input type="checkbox"/> |
| Sonstiges Personal (z.B. Reinigungspersonal) mit gleicher Muttersprache                                                                                       | <input type="checkbox"/> | <input type="checkbox"/> | <input type="checkbox"/> | <input type="checkbox"/> |
| Speziell ausgebildete professionelle Dolmetscher/innen                                                                                                        | <input type="checkbox"/> | <input type="checkbox"/> | <input type="checkbox"/> | <input type="checkbox"/> |
| Sonstige, und zwar:  _____                                                   |                          |                          | <input type="checkbox"/> | <input type="checkbox"/> |

| 13. Stehen die folgenden Leistungen/Materialien in Ihrer Einrichtung zur Verfügung, um Menschen mit besonderen Bedarfen (z.B. Einschränkungen) die Kommunikation zu erleichtern? | Nicht zutreffend         | Nein                     | In Planung               | Ja                       |
|----------------------------------------------------------------------------------------------------------------------------------------------------------------------------------|--------------------------|--------------------------|--------------------------|--------------------------|
| Schriftdolmetscher/innen (Verschriftlichung des Gesprochenen)                                                                                                                    | <input type="checkbox"/> | <input type="checkbox"/> | <input type="checkbox"/> | <input type="checkbox"/> |
| Informationsmaterial/Speisepläne in Brailleschrift                                                                                                                               | <input type="checkbox"/> | <input type="checkbox"/> | <input type="checkbox"/> | <input type="checkbox"/> |
| Bei Bedarf können Gebärdendolmetscher/innen herangezogen werden                                                                                                                  | <input type="checkbox"/> | <input type="checkbox"/> | <input type="checkbox"/> | <input type="checkbox"/> |
| Mitarbeiter/innen erhalten eine Liste von Kollegen/innen mit Fremdsprachenkenntnissen                                                                                            | <input type="checkbox"/> | <input type="checkbox"/> | <input type="checkbox"/> | <input type="checkbox"/> |
| Sonstige, und zwar:  _____                                                                    |                          |                          | <input type="checkbox"/> | <input type="checkbox"/> |

## Unterbringung, Versorgung und Verpflegung

| 14. Welche der folgenden <u>therapeutischen</u> Angebote – sofern zutreffend – können Patienten/innen in Ihrer Einrichtung nutzen, falls sie es wünschen? (Mehrfachantworten möglich.) |                                                                                                                                                                                          |
|----------------------------------------------------------------------------------------------------------------------------------------------------------------------------------------|------------------------------------------------------------------------------------------------------------------------------------------------------------------------------------------|
| <input type="checkbox"/> Gruppentherapien (z.B. Schwimm- und Bewegungsangebote), die getrennt für beide Geschlechter angeboten werden                                                  | <input type="checkbox"/> Angepasste Schulungen und Informationsveranstaltungen (z.B. Diabetesschulungen, die kulturelle Krankheitsvorstellungen oder Speisegewohnheiten berücksichtigen) |
| <input type="checkbox"/> Möglichkeit, ausschließlich vom Personal des eigenen Geschlechtes behandelt zu werden                                                                         | <input type="checkbox"/> Möglichkeit, zwischen unterschiedlichen Therapiealternativen zu wählen                                                                                          |
| <input type="checkbox"/> Keine der zuvor genannten Angebote                                                                                                                            | <input type="checkbox"/> Sonstiges, und zwar:  _____                                                |
| <input type="checkbox"/> Die genannten Angebote treffen auf meine Einrichtung nicht zu                                                                                                 |                                                                                                                                                                                          |

| 15. Welche der folgenden <u>nicht-therapeutischen</u> Angebote – sofern zutreffend – stehen in Ihrer Einrichtung zur Verfügung? (Mehrfachantworten möglich.) |                                                                                                                                           |
|--------------------------------------------------------------------------------------------------------------------------------------------------------------|-------------------------------------------------------------------------------------------------------------------------------------------|
| <input type="checkbox"/> Gebetsraum/neutral gestalteter Religionsraum                                                                                        | <input type="checkbox"/> Fremdsprachige Zeitschriften/Zeitungen                                                                           |
| <input type="checkbox"/> Fremdsprachige Fernsehsender (ohne englische Sender)                                                                                | <input type="checkbox"/> Menüauswahl, die kulturelle Bedürfnisse berücksichtigt (z.B. Angebot von Halal- und koscherer Kost)              |
| <input type="checkbox"/> Geänderte Öffnungszeiten der Cafeteria (z.B. im Ramadan nach Sonnenuntergang)                                                       | <input type="checkbox"/> Sonstiges, und zwar:  _____ |
| <input type="checkbox"/> Die genannten Angebote treffen auf meine Einrichtung nicht zu                                                                       |                                                                                                                                           |

|                                                                                                                                                  |                                                                                                                                      |
|--------------------------------------------------------------------------------------------------------------------------------------------------|--------------------------------------------------------------------------------------------------------------------------------------|
| <b>16. Wie werden die Wünsche von Patienten/innen im Hinblick auf ihre Versorgung in Ihrer Einrichtung erhoben?</b> (Mehrfachantworten möglich.) |                                                                                                                                      |
| <input type="checkbox"/> Es findet keine Erhebung statt                                                                                          | <input type="checkbox"/> Mündlich während des Aufnahme-/Anamnesegesprächs                                                            |
| <input type="checkbox"/> Patienten/innen füllen einen Fragebogen aus                                                                             | <input type="checkbox"/> Anders, und zwar:  _____ |

|                                                                                                                                                                                         |                                                                                                  |                          |                              |
|-----------------------------------------------------------------------------------------------------------------------------------------------------------------------------------------|--------------------------------------------------------------------------------------------------|--------------------------|------------------------------|
| <b>17. Inwieweit werden folgende Informationen Ihrer Patienten/innen routinemäßig (z.B. im Rahmen der Anamnese) erhoben und ausgewertet (z.B. zum Zwecke des Qualitätsmanagements)?</b> | Wird nicht erhoben                                                                               | Wird erhoben             | Wird erhoben und ausgewertet |
| Nationalität                                                                                                                                                                            | <input type="checkbox"/>                                                                         | <input type="checkbox"/> | <input type="checkbox"/>     |
| Muttersprache/Sprachkenntnisse (inkl. Deutschkenntnisse)                                                                                                                                | <input type="checkbox"/>                                                                         | <input type="checkbox"/> | <input type="checkbox"/>     |
| Übersetzungsbedarf (bei nicht ausreichenden Deutschkenntnissen)                                                                                                                         | <input type="checkbox"/>                                                                         | <input type="checkbox"/> | <input type="checkbox"/>     |
| Konfession                                                                                                                                                                              | <input type="checkbox"/>                                                                         | <input type="checkbox"/> | <input type="checkbox"/>     |
| Fähigkeiten zu lesen und zu schreiben                                                                                                                                                   | <input type="checkbox"/>                                                                         | <input type="checkbox"/> | <input type="checkbox"/>     |
| Wertvorstellungen bzw. kulturspezifische Einstellungen (z.B. in Bezug auf Krankheit)                                                                                                    | <input type="checkbox"/>                                                                         | <input type="checkbox"/> | <input type="checkbox"/>     |
| Essgewohnheiten (z.B. vegetarische, koschere und Helal-Kost)                                                                                                                            | <input type="checkbox"/>                                                                         | <input type="checkbox"/> | <input type="checkbox"/>     |
| Besondere Bedarfslagen (z. B. Bewegungseinschränkungen, Minderung des Seh- oder Hörvermögens)                                                                                           | <input type="checkbox"/>                                                                         | <input type="checkbox"/> | <input type="checkbox"/>     |
| Sexuelle Identität (z.B. Transgender etc.)                                                                                                                                              | <input type="checkbox"/>                                                                         | <input type="checkbox"/> | <input type="checkbox"/>     |
| Familiäre Situation (z. B. minderjährige Kinder oder zu pflegende Angehörige)                                                                                                           | <input type="checkbox"/>                                                                         | <input type="checkbox"/> | <input type="checkbox"/>     |
| Sonstiges, und zwar:  _____                                                                          |                                                                                                  | <input type="checkbox"/> | <input type="checkbox"/>     |
| <b>18. Die ausgewerteten Daten werden dafür genutzt, um unsere therapeutischen und nicht-therapeutischen Angebote den Bedürfnissen der Patienten/innen anzupassen</b>                   | <input type="checkbox"/> ja <input type="checkbox"/> nein<br><input type="checkbox"/> in Planung |                          |                              |

## Sonstige Aspekte der Diversitätssensibilität

|                                                                                                                |                          |                          |                          |                          |
|----------------------------------------------------------------------------------------------------------------|--------------------------|--------------------------|--------------------------|--------------------------|
| <b>19. Wie wichtig ist Ihrer Meinung nach die Diversitätssensibilität einer Versorgungseinrichtung für ...</b> | Vollkommen unwichtig     | Eher unwichtig           | Eher wichtig             | Sehr wichtig             |
| ...die Zufriedenheit von Patienten/innen                                                                       | <input type="checkbox"/> | <input type="checkbox"/> | <input type="checkbox"/> | <input type="checkbox"/> |
| ...die Zufriedenheit von Mitarbeiter/innen (z.B. durch bessere Behandlungs- und Prozessabläufe)                | <input type="checkbox"/> | <input type="checkbox"/> | <input type="checkbox"/> | <input type="checkbox"/> |
| ...den Behandlungserfolg von Patienten/innen                                                                   | <input type="checkbox"/> | <input type="checkbox"/> | <input type="checkbox"/> | <input type="checkbox"/> |
| ...die Steigerung von Patienten/innen-Zahlen                                                                   | <input type="checkbox"/> | <input type="checkbox"/> | <input type="checkbox"/> | <input type="checkbox"/> |
| Sonstiges, und zwar:  _____ |                          | <input type="checkbox"/> | <input type="checkbox"/> | <input type="checkbox"/> |

|                                                                                                         |                          |                          |                          |                          |
|---------------------------------------------------------------------------------------------------------|--------------------------|--------------------------|--------------------------|--------------------------|
| <b>20. Bitte geben Sie an, inwieweit Sie den folgenden Aussagen zustimmen.</b>                          | Stimme voll zu           | Stimme eher zu           | Stimme eher nicht zu     | Stimme nicht zu          |
| Es ist notwendig, unsere Einrichtung diversitätssensibel auszurichten.                                  | <input type="checkbox"/> | <input type="checkbox"/> | <input type="checkbox"/> | <input type="checkbox"/> |
| Unsere Einrichtung geht auf Behandlungsbedürfnisse von Patienten/innen ein.                             | <input type="checkbox"/> | <input type="checkbox"/> | <input type="checkbox"/> | <input type="checkbox"/> |
| Zukünftig ist eine stärkere Ausrichtung unserer Einrichtung auf diversitätssensible Aspekte vorgesehen. | <input type="checkbox"/> | <input type="checkbox"/> | <input type="checkbox"/> | <input type="checkbox"/> |

| 20. Bitte geben Sie an, inwieweit Sie den folgenden Aussagen zustimmen.                                                             | Stimme voll zu           | Stimme eher zu           | Stimme eher nicht zu     | Stimme nicht zu          |
|-------------------------------------------------------------------------------------------------------------------------------------|--------------------------|--------------------------|--------------------------|--------------------------|
| <b>Fortsetzung</b>                                                                                                                  |                          |                          |                          |                          |
| Es ist wichtig, dass unsere Mitarbeiter/innen an Fortbildungen/Schulungen zum Umgang mit Diversität teilnehmen.                     | <input type="checkbox"/> | <input type="checkbox"/> | <input type="checkbox"/> | <input type="checkbox"/> |
| Eine diversitätssensible Ausrichtung ist aufgrund der derzeitigen finanziellen Situation für unsere Einrichtung nicht realisierbar. | <input type="checkbox"/> | <input type="checkbox"/> | <input type="checkbox"/> | <input type="checkbox"/> |
| Eine diversitätssensible Ausrichtung wird für viele Einrichtungen zukünftig eine noch größere Rolle als heute spielen.              | <input type="checkbox"/> | <input type="checkbox"/> | <input type="checkbox"/> | <input type="checkbox"/> |
| Praxisnahe Handlungsempfehlungen könnten die Implementierung von diversitätssensiblen Maßnahmen fördern.                            | <input type="checkbox"/> | <input type="checkbox"/> | <input type="checkbox"/> | <input type="checkbox"/> |

**21. Welche Hindernisse sehen/sahen Sie bei der Umsetzung einer diversitätssensiblen Versorgung in Ihrer Einrichtung?** (Mehrfachantworten möglich.)

|                                                                                                                |                                                                                                                                      |
|----------------------------------------------------------------------------------------------------------------|--------------------------------------------------------------------------------------------------------------------------------------|
| <input type="checkbox"/> Es gab/gibt keine Hindernisse                                                         | <input type="checkbox"/> Nicht zutreffend, da keine Absicht zur Implementierung solcher Maßnahmen in unserer Einrichtung besteht     |
| <input type="checkbox"/> Mangelnde Motivation zur Umsetzung solcher Maßnahmen auf Seiten des Personals         | <input type="checkbox"/> Nicht alle Entscheidungsträger/innen der Einrichtung sind von der Notwendigkeit solcher Maßnahmen überzeugt |
| <input type="checkbox"/> Organisatorische Schwierigkeiten                                                      | <input type="checkbox"/> Fehlende finanzielle Ressourcen                                                                             |
| <input type="checkbox"/> Fehlende Anreize des Versorgungsträgers (Rentenversicherung, Krankenkassen etc.)      | <input type="checkbox"/> Unklarheit, wie diversitätssensible Maßnahmen umgesetzt werden können                                       |
| Sonstiges, und zwar:  _____ |                                                                                                                                      |

**22. Woraus sollten Handlungsempfehlungen zur Implementierung diversitätssensibler Maßnahmen inhaltlich bestehen?** (Mehrfachantworten möglich.)

|                                                                                                                |                                                                                  |                                                                          |
|----------------------------------------------------------------------------------------------------------------|----------------------------------------------------------------------------------|--------------------------------------------------------------------------|
| <input type="checkbox"/> Fallbeispiele                                                                         | <input type="checkbox"/> Hinweise zu weiterführenden Informationen               | <input type="checkbox"/> Beispielmaßnahmen                               |
| <input type="checkbox"/> Hinweise zu Internetmaterialien                                                       | <input type="checkbox"/> Hinweise zum Umgang bei Implementierungsschwierigkeiten | <input type="checkbox"/> Anleitung zur Umsetzung von Maßnahmen/Konzepten |
| Sonstiges, und zwar:  _____ |                                                                                  |                                                                          |

**23. Wie würden Sie gerne informiert werden?** (Mehrfachantworten möglich.)

|                                                                                                                |                                           |                                        |                                         |
|----------------------------------------------------------------------------------------------------------------|-------------------------------------------|----------------------------------------|-----------------------------------------|
| <input type="checkbox"/> Arbeitsbuch/Broschüre                                                                 | <input type="checkbox"/> Schulung/Seminar | <input type="checkbox"/> Internetseite | <input type="checkbox"/> Smartphone-App |
| Sonstiges, und zwar:  _____ |                                           |                                        |                                         |

**Falls Sie weitere Anmerkungen zum Forschungsthema haben, dann notieren Sie diese gerne hier:** 

### Herzlichen Dank für Ihre Teilnahme!

Bitte schicken Sie den ausgefüllten Fragebogen im beiliegenden Umschlag bis zum **07.06.2019** direkt an XXX. Das Porto übernehmen wir.
